# Supplementary material for: Fabrication of Colorimetric Textile Sensor Based on Rhodamine Dye for Acidic Gas Detection
Source: MDPI journal article supplement (doi:10.3390/polym12020431), 2020-02-12
Supplement: s1 [file s1]

# Fabrication of colorimetric textile sensor based on Rhodamine dye for acidic gas detection

Young Ki Park, Byeong M. Oh, A Ra Jo, Ji Hyeon Han, Jee Young Lim, Hyun Ju Oh, Seung Ju Lim, Jong H. Kim and Woosung Lee

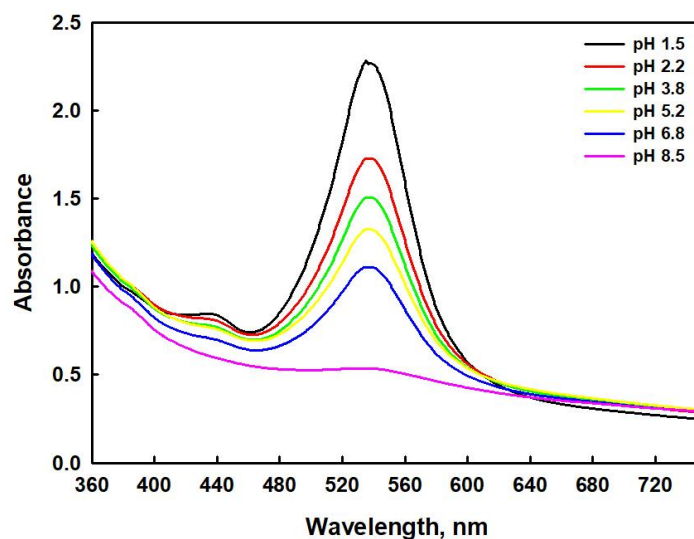

Figure S1. Halochromic property of RhYK dye ( $2.61 \times 10^{-4} \text{ mol}\cdot\text{L}^{-1}$ ) in MeOH.

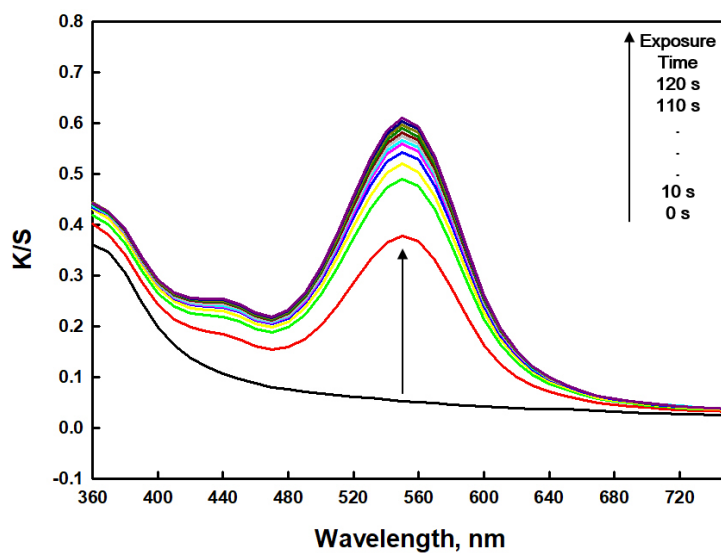

Figure S2. Time-dependent color change of dyed sensor on exposure to gaseous HCl (10 ppm).

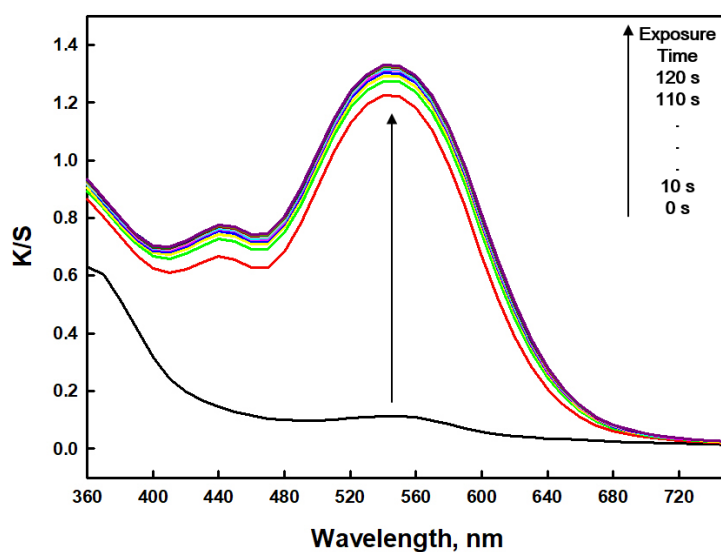

**Figure S3.** Time-dependent color change of printed sensor on exposure to gaseous HCl (10 ppm).

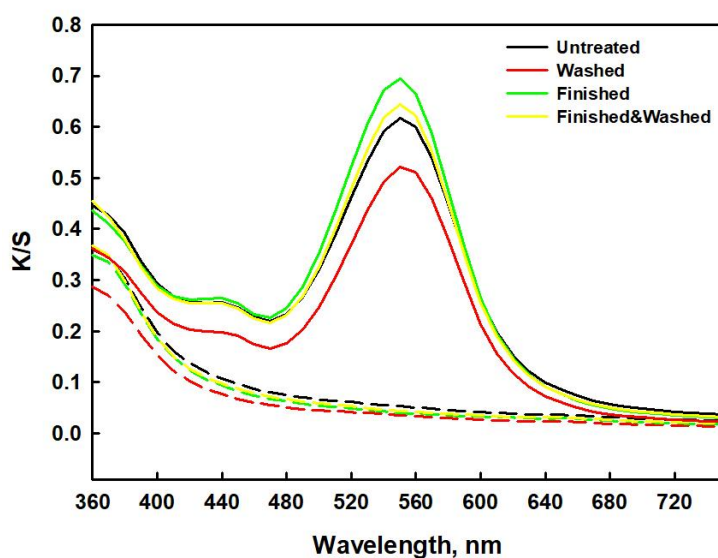

**Figure S4.** Color strength changes according to washing and finishing of the dyed sensor: before (dashed) and after (solid) gas exposure.

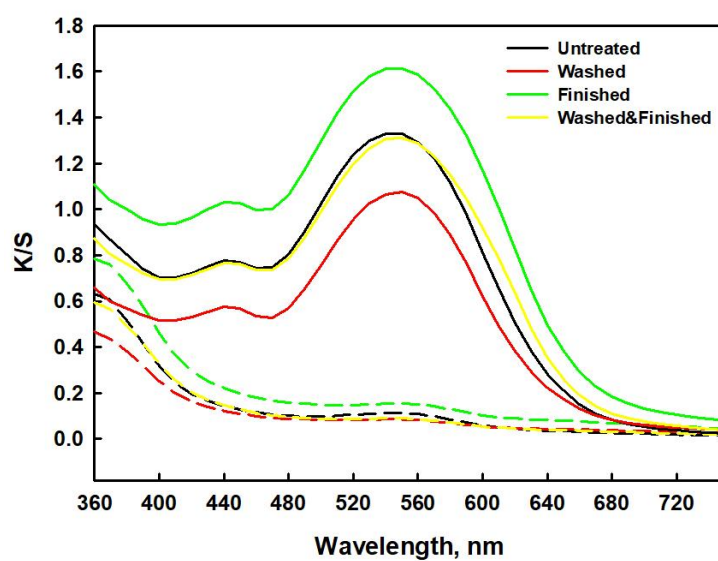

**Figure S5.** Color strength changes according to washing and finishing of the printed sensor: before (dashed) and after (solid) gas exposure.

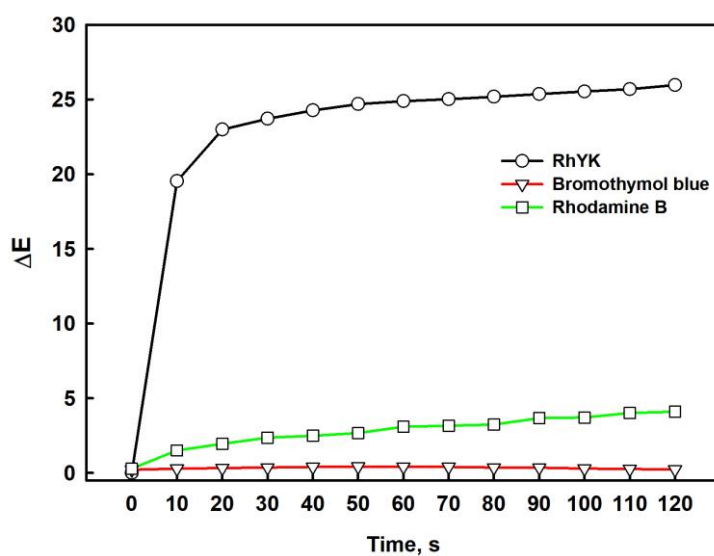

**Figure S6.** Time-dependent color change of dyed sensors on exposure to gaseous HCl (10 ppm).

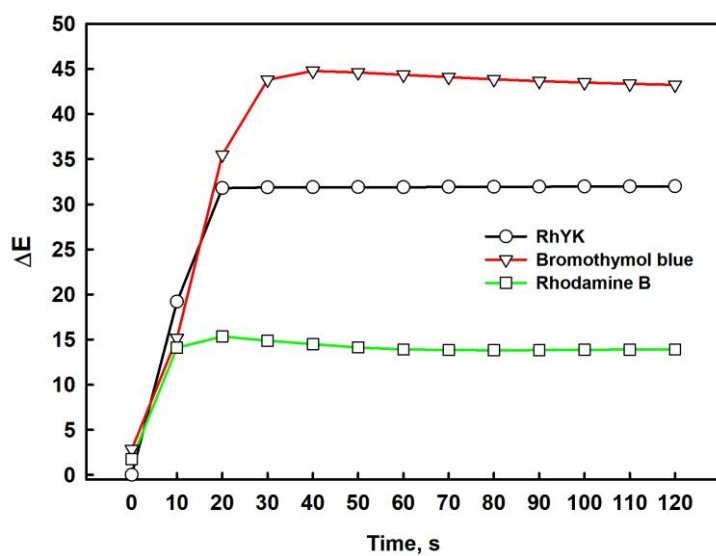

**Figure S7.** Time-dependent color change of printed sensors on exposure to gaseous HCl (10 ppm).

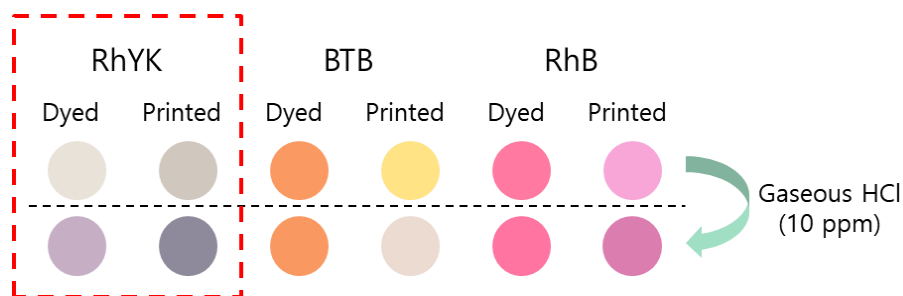

**Figure S8.** Color change of fabricated sensors on exposure to gaseous HCl (10 ppm).

**Table S1.** Sensitive color changes of prototype cloths based on dyed and printed textile sensors when exposed to gaseous HCl (200 ppm).

| Types of fabrication | Before | After (2 min) |
|----------------------|--------|---------------|
| Dyed                 |        |               |
| Printed              |        |               |

**Table S2.** Effect of VOCs on sensor's acid gas detection performance (poison effect).

| VOCs         | Immersion                                                                           | After Immersion                                                                      | After Exposure to Gaseous HCl                                                         |
|--------------|-------------------------------------------------------------------------------------|--------------------------------------------------------------------------------------|---------------------------------------------------------------------------------------|
| Methanol     | 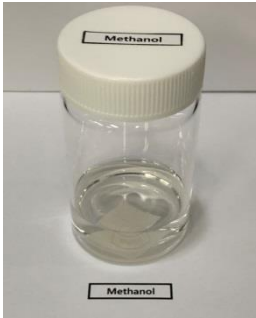   |    |    |
| Ethanol      |    |    |    |
| Toluene      |  |  |  |
| Formaldehyde |  |  |  |
